# Supplementary material for: Continuous signaling of CD79b and CD19 is required for the fitness of Burkitt lymphoma B cells
Source: PubMed Central journal article supplement (PMC5983214; doi:10.15252/embj.201797980), 2018-04-18
Supplement: EMBJ-37-e97980-s001.pdf [file EMBJ-37-e97980-s001.pdf]

# **Table of contents**

**Appendix Figure S1**

**Appendix Figure S2**

**Appendix Figure S3**

**Appendix Figure S4**

**Appendix Figure S5**

**Appendix Figure S6**

**Appendix Table S1**

**Appendix Table S2**

## **Appendix Figure legends**

### **Appendix Figure S1.**

(A and C) A schematic diagram showing the route for the generation of single- and multi-BCR component KOs from WT Ramos B cells by the CRISPR/Cas9 method. (B and D) Expression of the indicated BCR component in WT and the different Ramos KO cells as measured by flow cytometry after staining with the corresponding antibodies. (E) Western blot analysis of the expression of the indicated BCR component in WT and the different KO Ramos cells. One clone is used for each genotype.

### **Appendix Figure S2.**

Cell proliferation assay of WT and BCR component KO Ramos cells using CytoTell™ Ultragreen. The data are representative of three independent experiments. One clone is used for each genotype.

### **Appendix Figure S3.**

Growth competition between BCR component KO cells and gWT Ramos cells. The GFP<sup>+</sup> viable cells were single-cells sorted into 96-well plates 48h post transfection of the CRISPR/Cas9 KO plasmid. The sorted cells were cultured for 10 days and then transferred into larger wells for expansion for another 4 days. After the deletion of the target gene has been confirmed by staining with the corresponding antibodies, the freshly generated single colonies were immediately used for growth competition assay. The competition between GFP-WT and gWT cells serves as a control. The data represent the mean and standard error of a minimum of three independent experiments. Differences between the WT and KO cells were evaluated by first performing the multiple t-test for each day without assuming the same SD and the multiple t-test results were then further analyzed using the False Discovery Rate (FDR, Q) approach with Two-stage linear step-up procedure. Data showed significant difference ( $Q < 0.01$ ) were marked by stars. One clone (Different than those used in Fig 1) is used for each genotype.

### **Appendix Figure S4.**

**(A-D)** Calcium responses of WT and the indicated BCR component KO Ramos cells upon the stimulation with anti-Ig $\alpha$  antibodies. HL KO = HC/LC double KO; HL $\alpha$  KO = HC/LC, Ig $\alpha$  triple KO; HL $\beta$  KO = HC/LC, Ig $\beta$  triple KO. One clone is used for each genotype.

**Appendix Figure S5.**

**(A)** A schematic diagram showing the generation of SLP65 KO from HL KO Ramos B cells by the CRISPR/Cas9 method. **(B)** Western blot analysis of SLP65 expression in HL double KO and HLSLP65 triple KO Ramos cells. The staining for GAPDH served as loading control. One clone is used for each genotype.

**Appendix Figure S6.**

**(A)** A schematic diagram showing the generation of CD19 or CD81 deficient cells from HL KO Ramos B cells by the CRISPR/Cas9 method. **(B)** FACScan analysis of CD19 or CD81 expression on HL KO, HLCD19 KO or HLCD81 KO Ramos B cells as measured by flow cytometry. One clone is used for HLKO. HLCD19KO and HLCD81 KO are batch sorted.



Fig. S2

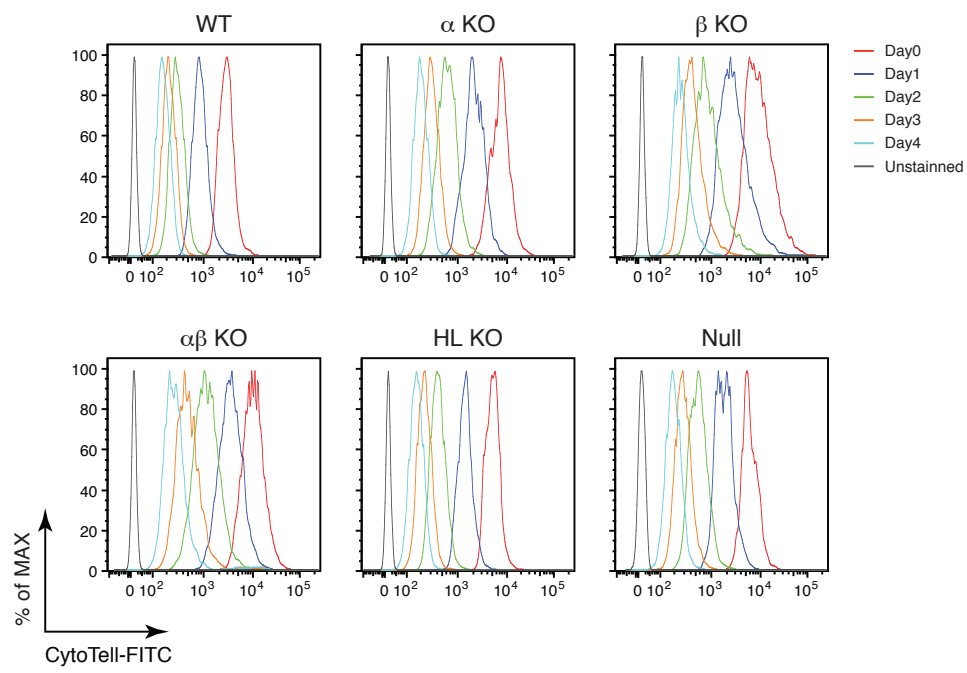

Fig. S3

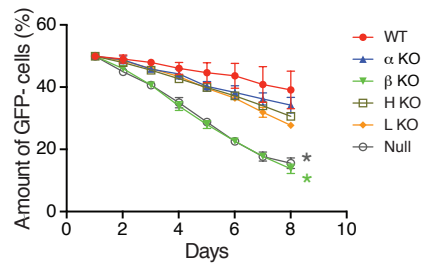

Fig. S4

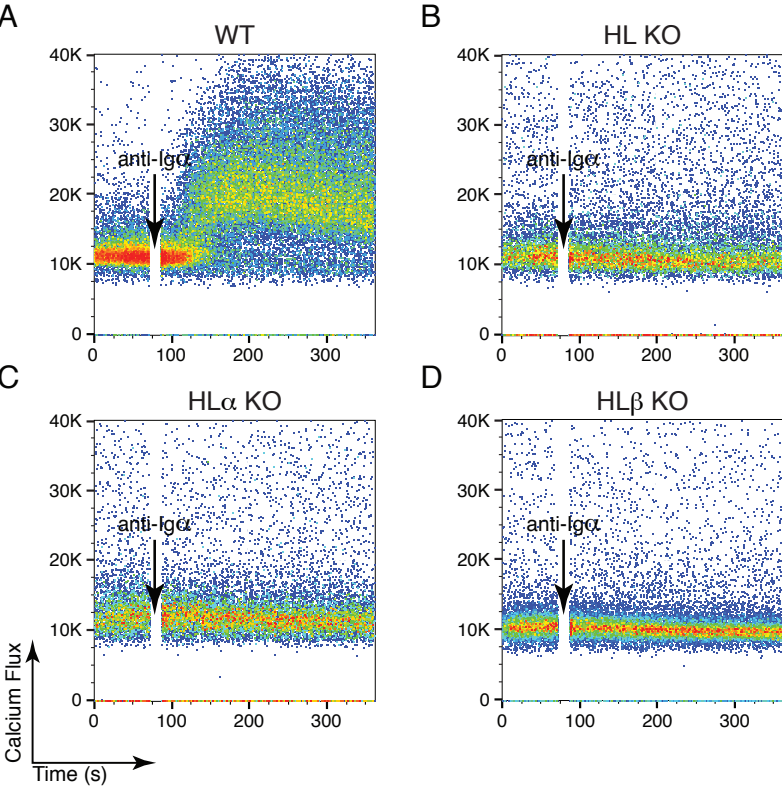

Fig. S5

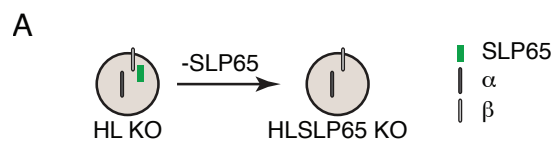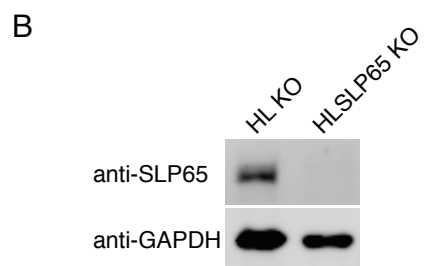



Fig. S6

A

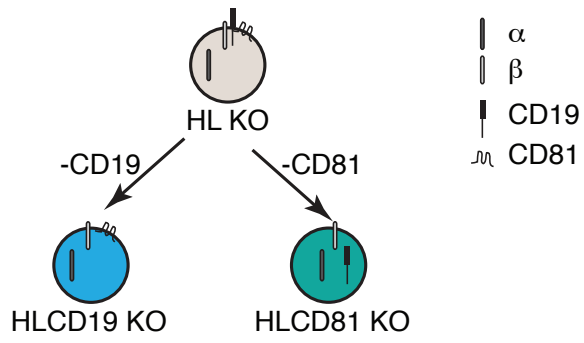

B

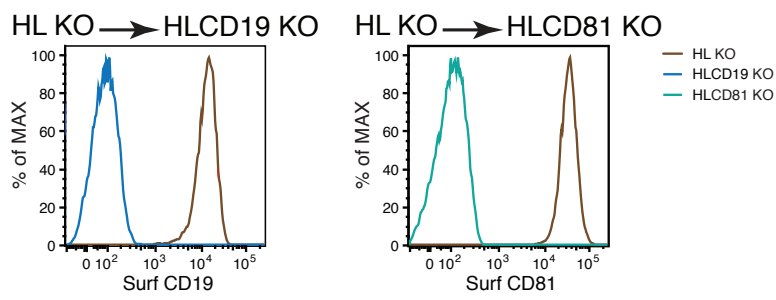

**Appendix Table S1. Information of CRISPR/Cas9 KO plasmids**

| <b>Target gene</b> | <b>Description</b>               |
|--------------------|----------------------------------|
| Ig $\alpha$        | Purchased from Santa Cruz        |
| Ig $\beta$         | Purchased from Santa Cruz        |
| mIg Heavy chain    | sgRNA 5'-CAGCTACAGCAGTGGGGCGC-3' |
| mIg Light chain    | sgRNA 5'-GGGGTTTCTAATCGCTTCTC-3' |
| SLP65              | Purchased from Santa Cruz        |
| CD19               | sgRNA 5'-AAGCGGGGACTCCCGAGACC-3' |
| CD81               | Purchased from Santa Cruz        |

**Appendix Table S2. Information of primers for cloning**

| Name         | Sequences 5'-3'                                       | Template      | Final plasmid description                                                  |
|--------------|-------------------------------------------------------|---------------|----------------------------------------------------------------------------|
| Igβ65F       | GTTTGGGGTCGGGGAC<br>AG                                | Ramos<br>cDNA | pJET-Igβ                                                                   |
| Igβ704 R     | CCCGTCCATCCCCAGA<br>GA                                |               |                                                                            |
| pMIGIgβ_F    | ATTAGATCTCTCGAGCC<br>ACATGGCCAGGCTGGC<br>GTTG         | pJET-Igβ      | PCR fragments were fused into the Xho I linearized pMIG to obtain pMIG-Igβ |
| pMIGIgβ_R    | GCGGAATTCGTAACTC<br>ACTCCTGGCCTGGGTG                  |               |                                                                            |
| pMIGHAIgβ_F1 | TATCCATATGATGTTCC<br>AGATTATGCTGCCAGA<br>TCGGAGGACCGG | pMIG-Igβ      | HA tagged Igβ plasmid: pMIG-HA-Igβ                                         |
| pMIG_R1      | CCGTAGAAAAGATCAA<br>AG                                |               |                                                                            |
| pMIG_F2      | TGATCTTTTCTACGGGG<br>T                                | pMIG-Igβ      |                                                                            |
| pMIGHAIgβ_R2 | AACATCATATGGATAT<br>GCTGGTACTGGCTCAG<br>C             |               |                                                                            |
| Igα74F       | GCCACTGGAGCCCATC<br>TC                                | Ramos<br>cDNA | pJET-Igα                                                                   |
| Igα771R      | CCTGGCAGGAGTAGGG<br>GT                                |               |                                                                            |
| pMIGIgα_F    | ATTAGATCTCTCGAGCC<br>ACATGCCTGGGGGTCC<br>AGGA         | pJET-Igα      | PCR fragments were fused into the Xho I linearized pMIG to obtain pMIG-Igα |
| pMIGIgα_R    | GCGGAATTCGTAACTC<br>ACGGCTTCTCCAGCTG                  |               |                                                                            |
| pMIGIgβAt_F1 | CCTATCTTCTGCTGAG<br>GAAACGATGGCAGAAC                  | pMIG-Igα      | Two PCR fragments were fused together to                                   |

|                      |                                               |                    |                                                                              |
|----------------------|-----------------------------------------------|--------------------|------------------------------------------------------------------------------|
| pMIG_R1              | See above                                     |                    | obtain pMIG-HA-Ig $\beta$ - Ig $\alpha$ tail                                 |
| pMIG_F2              | See above                                     | pMIG-HA-Ig $\beta$ |                                                                              |
| pMIGIg $\beta$ At_R2 | CTGCCATCGTTTCCTCA<br>GCAGGAAGATAGGCAC         |                    |                                                                              |
| Ig $\beta$ Y196F_F   | GGAAGATCACACCTTC<br>GAGGGCCTGGACA             | pMIG-HA-Ig $\beta$ | Ig $\beta$ ITAM Y196 was mutated into F                                      |
| Ig $\beta$ Y196F_R   | TGTCCAGGCCCTCGAA<br>GGTGTGATCTTCC             |                    |                                                                              |
| Ig $\beta$ Y207F_F   | CCAGACAGCCACCTTT<br>GAGGACATAGTGA             | pMIG-HA-Ig $\beta$ | Ig $\beta$ ITAM Y207 was mutated into F                                      |
| Ig $\beta$ Y207F_R   | TCACTATGTCCTCAAAG<br>GTGGCTGTCTGG             |                    |                                                                              |
| Ig $\beta$ TailL_F1  | AAGGATGACAGCAAGT<br>GAGTTAACGAATTCCG<br>C     | pMIG-HA-Ig $\beta$ | Two PCR fragments were fused together to obtain pMIG-HA-Ig $\beta$ tail less |
| pMIG_R1              | See above                                     |                    |                                                                              |
| pMIG_F2              | See above                                     | pMIG-HA-Ig $\beta$ |                                                                              |
| Ig $\beta$ TailL_R2  | GAATTCGTTAACTCACT<br>TGCTGTCATCCTTGTC         |                    |                                                                              |
| CD19_F1              | CCCCGGAGAGTCTGAC<br>CA                        | Ramos<br>cDNA      | pJET- CD19                                                                   |
| CD19_R1              | AGGAGATCCAGGCTGG<br>CC                        |                    |                                                                              |
| pMIGCD19_F           | ATTAGATCTCTCGAGCC<br>ACATGCCACCTCCTCGC<br>CTC | pJET- CD19         | PCR fragments were fused into the Xho I linearized pMIG to obtain pMIG-CD19  |
| pMIGCD19_R           | GCGGAATTCGTTAACTC<br>ACCTGGTGCTCCAGGT         |                    |                                                                              |
